# Supplementary material for: Hinokitiol Inhibits Breast Cancer Cells In Vitro Stemness-Progression and Self-Renewal with Apoptosis and Autophagy Modulation via the CD44/Nanog/SOX2/Oct4 Pathway
Source: Int J Mol Sci. 2024 Mar 31;25(7):3904. doi: 10.3390/ijms25073904 (PMC11011552; doi:10.3390/ijms25073904)
Supplement: Supplementary file 1 [file ijms-25-03904-s001.zip › ijms-2882451-supplementary.pdf]

## Supplemental Materials and Methods

### Flow cytometry measurement for apoptosis

Cell ( $1 \times 10^5$  cells) were seeded in 6 cm dish, treated with hinokitiol for 48 hours. Used Annexin V-FITC apoptosis detection kit (BD Biosciences, Franklin Lakes, NJ, USA) and performed according manufacturer's instructions. Briefly, after harvested the cell, cell was resuspended with binding buffer and stained with  $2.5 \mu\text{L}$  of Annexin V-FITC and  $2.5 \mu\text{L}$  of PI for 15 min at room temperature. Cell apoptosis distributions was detected by Attune™ NxT Flow Cytometer (Thermo Fisher Scientific, Waltham, MA, USA). The late apoptosis indicated the Annexin V-FITC positive and PI positive percentage, while early apoptosis indicated the Annexin V-FITC positive alone group.

### Western blot

The radioimmunoprecipitation assay (RIPA) buffer-supplied with protease inhibitor and phosphatase inhibitor (Roche Mannheim, Baden-Württemberg, Germany) were used to homogenize cell pellets. The resulting lysates were loaded onto 15% SDS-PAGE gels for protein separation, which was then transferred to PVDF membranes. Antibodies Cathepsin B (Cell signaling (Danvers, MA, USA)), and glyceraldehyde-3-phosphate dehydrogenase (GAPDH) (Proteintech,) against were used for blot incubation at a 1:1000 or 1:10000 dilutions, followed by incubation with HRP-conjugated anti-rabbit in TBST (1:10000, Jackson ImmunoResearch Laboratories (West Grove, PA, USA)). The protein signal was visualized using ECL (T-Pro Biotechnology, New Taipei City, Taiwan) and detected by eBlot Touch Imager (eBlot Photoelectric Technology, Shanghai, China). Analysis was carried out using ImageJ software (NIH, Bethesda, MD, USA).

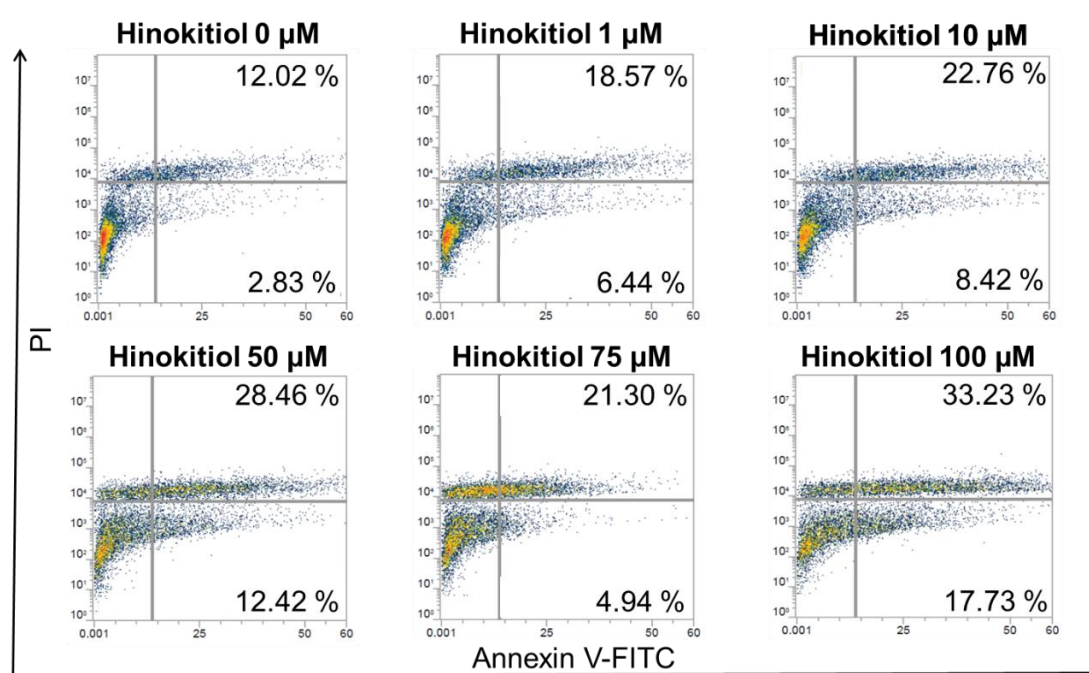

### Supplementary Figure S1 Hinokitiol-Induced Apoptosis Activation in MDA-MB-231 Cells

MDA-MB-231 cells were treated with hinokitiol for a duration of 48 hours. After treatment, the cells were stained with Annexin V-FITC and propidium iodide (PI), and flow cytometry was employed to quantify the percentage of cells undergoing apoptosis.

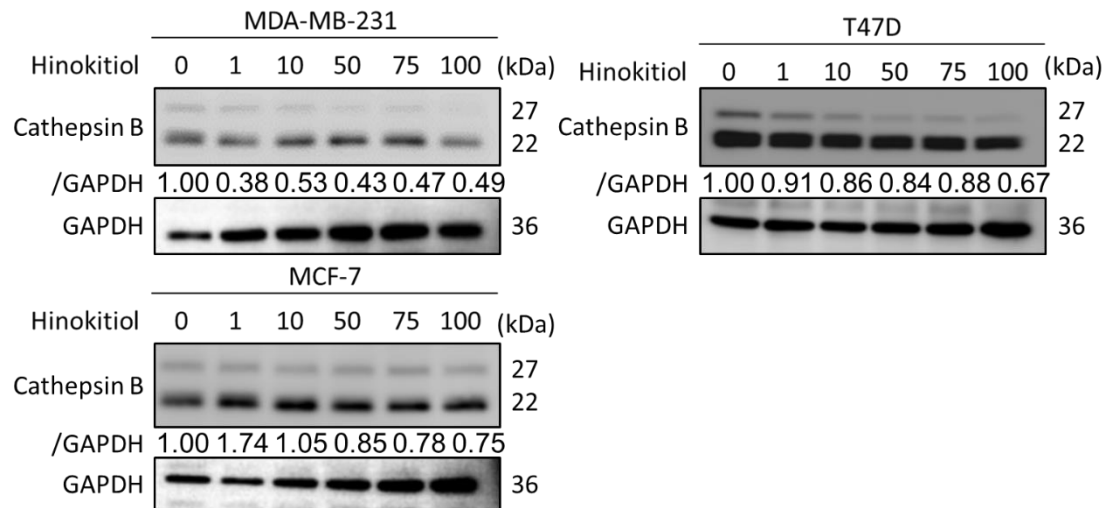

**Supplementary Figure S2 Hinokitiol-Induced lysosome reduction in BC cell line.**

MDA-MB-231, MCF-7, T47D cells were culture in 6 cm dish and treated with hinokitiol for 48H. Used western blot to evaluate the lysosome marker cathepsin B protein expression.
